# It is us against cancer

**Kayden Owee** (Malaysia)

The Biochemical Society identifies and celebrates outstanding science communication talent in the molecular biosciences with its annual Science Communication Prize. Kayden Owee, from Malaysia, won the first prize in the media category for students studying for A-level/T-level/BTEC National/Scottish Highers or equivalent qualifications. Kayden's entry is titled 'It Is Us Against Cancer'.

## Introduction from the author

Cancer, albeit widespread, can seem like a distant issue until it strikes close to us. With greater consciousness regarding cancer, we can all take steps towards mitigating cancer-causing risks and undergo regular check-ups for early detection. In the undesirable likelihood of being diagnosed with cancer, patients will also benefit from being more informed about the possible treatments available.

This video aims to give viewers a basic knowledge of what cancer is, its symptoms and forms of treatment.

I hope this video can serve as the public's first step into further understanding cancer.

## Entry

It is Us Against Cancer - Kayden Owee. ■

*You can view all the winners from 2022 and 2023 on our website. The Science Communication Prize will be back in summer 2024! Stay updated through our website and social media.*

## Author information

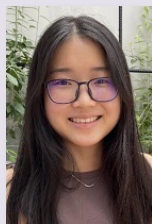

*Entering the competition was an eminent opportunity for me to hone various skills, including researching, conveying and video editing. More importantly, it would enable me to develop more knowledge regarding a molecular bioscience topic and deliver such understanding to the general public in a simplified manner. The decision to make my video entry regarding cancer was an apparent one. Like many others, I witnessed a family member endure being diagnosed with cancer, undergo treatment, but eventually succumb to cancer. This outcome might have been different if we knew how to prevent cancer, the early symptoms to identify cancer and the suitable treatment methods. Though I can't reverse the irreversible loss of kin, I hope to prevent others from losing their loved ones to cancer. Thus, I saw the need to increase public knowledge of the prevalence and symptoms of cancer. This way, we will have higher possibilities of early detection of cancer and cancer survival rates. You can view all the winners from <https://www.biochemistry.org/public-engagement/science-communication-prize/science-communication-prize-past-winners/> and <https://www.biochemistry.org/public-engagement/science-communication-prize/science-communication-prize-winners/> on our website. The <https://www.biochemistry.org/public-engagement/science-communication-prize/> will be back in summer 2024! Stay updated through our website and social media.*
